# Supplementary material
Source: publisher figshare collection journal article supplement (https://acs.figshare.com/ndownloader/files/4382209)

# Supporting Information

## *S1 Spectral changes of A $\beta$ <sub>1-40</sub> from basic to physiological pH*

1D  $^1\text{H}$  NMR spectra of A $\beta$ <sub>1-40</sub> before (dotted line) and after (full line) adjustment to physiological pH.

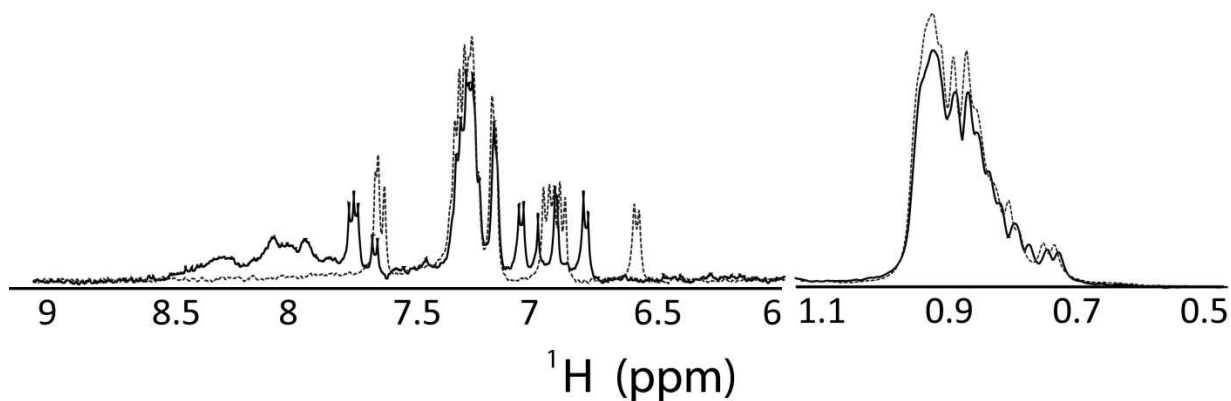

## *S2 Chemical shift assignments*

Assignment of  $^1\text{H}$  and  $^{15}\text{N}$  chemical shifts for amide groups of A $\beta$ <sub>1-40</sub> recorded at 800 MHz, 25 °C

| Residue | $^{15}\text{N}$ (ppm) | $^1\text{H}$ CS (ppm) | Residue | $^{15}\text{N}$ (ppm) | $^1\text{H}$ CS (ppm) |
|---------|-----------------------|-----------------------|---------|-----------------------|-----------------------|
| E3      | 120.223               | 8.461                 | V24     | 120.352               | 8.117                 |
| R5      | 123.591               | 8.119                 | G25     | 111.591               | 8.529                 |
| D7      | 121.568               | 8.257                 | S26     | 115.561               | 8.164                 |
| S8      | 116.468               | 8.383                 | K28     | 121.656               | 8.336                 |
| G9      | 110.704               | 8.522                 | G29     | 109.445               | 8.413                 |
| Y10     | 120.031               | 7.952                 | A30     | 123.572               | 8.027                 |
| E11     | 122.461               | 8.403                 | I31     | 120.37                | 8.123                 |
| V12     | 120.809               | 8.051                 | I32     | 125.552               | 8.222                 |
| Q15     | 121.539               | 8.399                 | G33     | 112.68                | 8.431                 |
| K16     | 122.583               | 8.354                 | L34     | 121.653               | 8.02                  |
| L17     | 123.544               | 8.199                 | M35     | 121.703               | 8.417                 |
| V18     | 121.054               | 7.958                 | V36     | 121.857               | 8.183                 |
| F19     | 123.966               | 8.211                 | G37     | 112.826               | 8.547                 |
| F20     | 122.621               | 8.21                  | G38     | 108.752               | 8.254                 |
| A21     | 126.01                | 8.228                 | V39     | 119.829               | 8.054                 |
| E22     | 119.859               | 8.352                 | V40     | 128.085               | 7.779                 |
| D23     | 121.177               | 8.374                 |         |                       |                       |

**S3 Congo Red calibration curve.**

Signal intensity of CR peaks plotted as a function of CR concentration. The data has been fitted to a linear calibration curve, which subsequently was used to estimate the amount of free CR in solution.

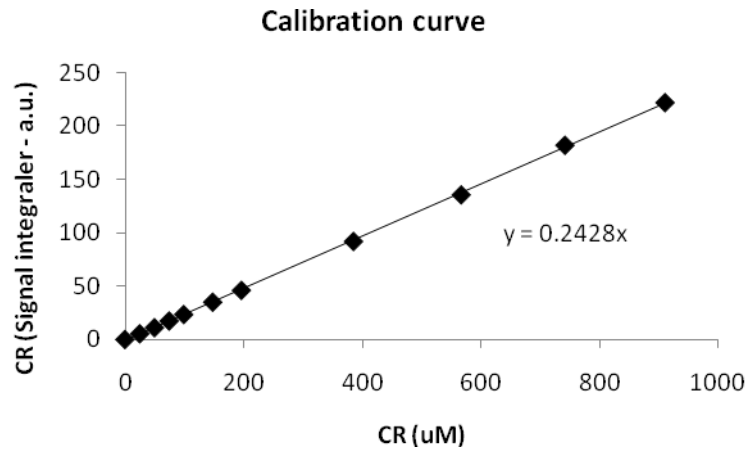

**S4 simulations of second binding step using different binding stoichiometries ( $n_2$ )**

Simulations of the total amount of bound CR have been carried out using the following equation describing a two-state binding:

$$[CR]_{bound} = \frac{n_1 \times [A\beta] \times [CR]_{free}}{K_{d1} + [CR]_{free}} + \frac{n_2 \times [A\beta] \times [CR]_{free}}{K_{d2} + [CR]_{free}}$$

$K_{d2}$  was fitted for different values of  $n_2$ , while  $n_1$  and  $K_{d1}$  were fixed at 1 and 5  $\mu$ M, respectively.

| $n_2$ | $K_{d2}$          | Binding curve |
|-------|-------------------|---------------|
| 0.5   | $90.7 \pm 127.7$  |               |
| 0.75  | $180.2 \pm 113.1$ |               |

1.0       $319.7 \pm 122.3$

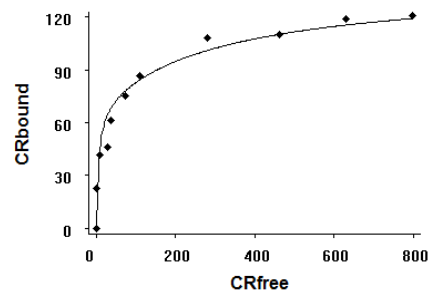

1.25       $498.8 \pm 150.4$

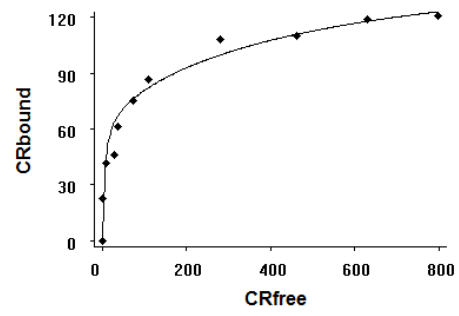

1.5       $698.8 \pm 188.0$

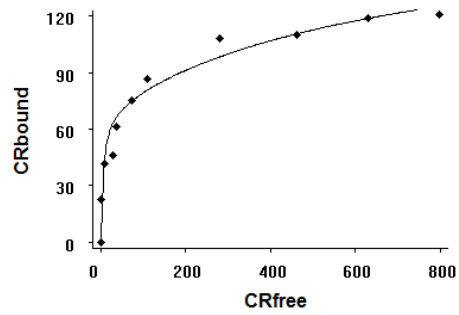

Supplement: Supplementary file 1 [file 4382209]
